# Supplementary material for: 2D Co-anti-MXenes (CoB/CoP) as promising anode materials for magnesium-ion batteries in diglyme and triglyme electrolytes: a first-principles study
Source: Royal Society of Chemistry journal article supplement (doi:10.1039/d4cp03358b), 2024-12-09
Supplement: d4cp03358b1.pdf [file d4cp03358b1.pdf]

## Supporting Information

### 2D Co-Anti MXenes (CoB/CoP) as Promising Anode Materials for Magnesium-Ion Batteries in Diglyme and Triglyme Electrolytes: A First-Principles Study

Nandhini Panjulingam, Senthilkumar Lakshmi<sup>pathi</sup>\*

Department of Physics, Bharathiar University, Coimbatore 641 046, Tamil Nadu, India

[\*] Corresponding author: Senthilkumar Lakshmi<sup>pathi</sup>

Email: [lsenthilkumar@buc.edu.in](mailto:lsenthilkumar@buc.edu.in)

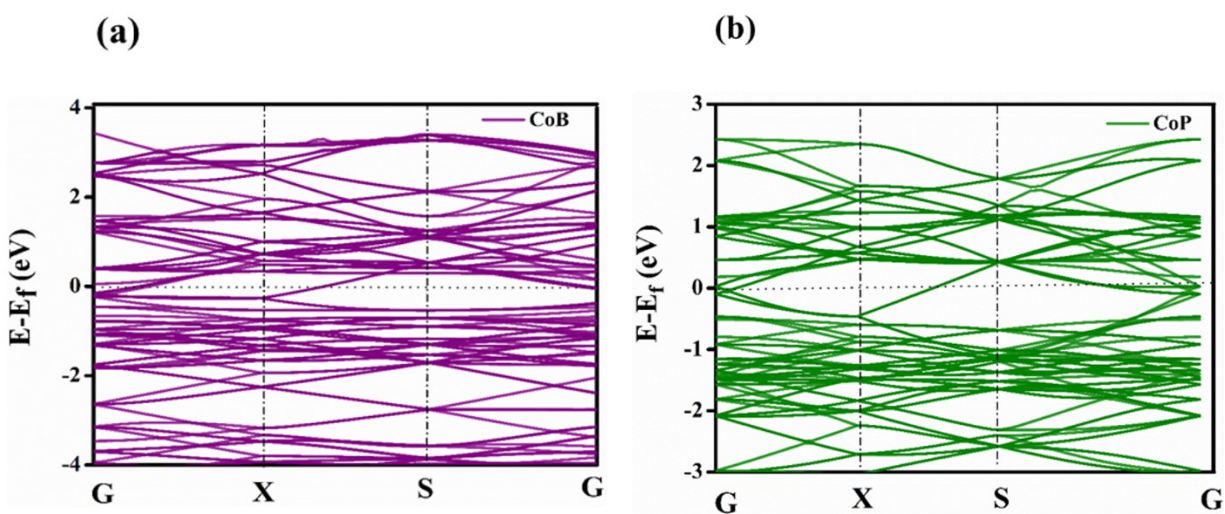

Figure S1. Band structure of (a) CoB and (b) CoP.

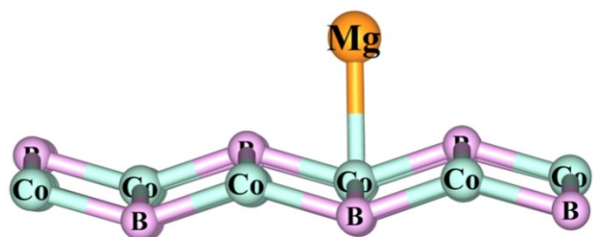

Mg@CoB site 1

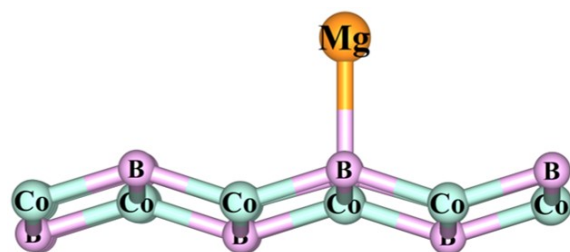

Mg@CoB site 2

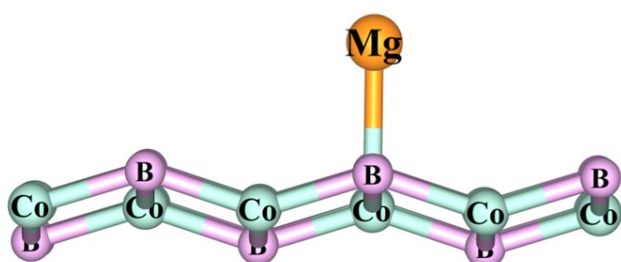

Mg@CoB site 3

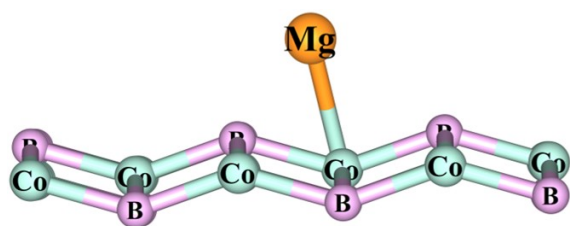

Mg@CoB site 4

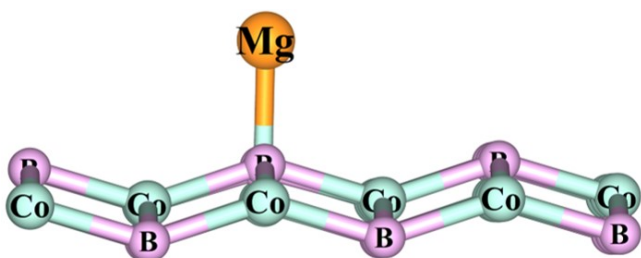

Mg@CoB site 5

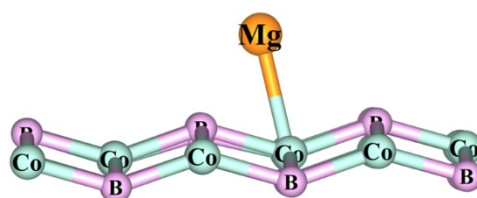

Mg@CoB site 6

**Figure S2.** The optimized structure of single Mg atom adsorption on CoB anti-MXene at different sites (diglyme condition).

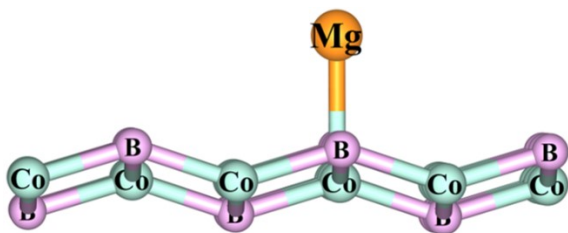

Mg@CoB site 1

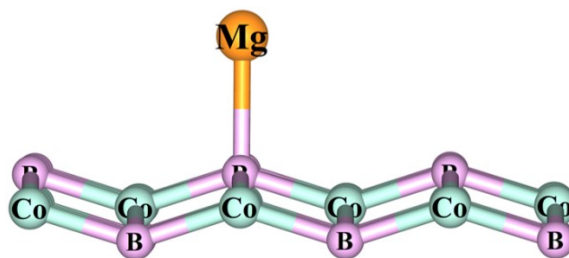

Mg@CoB site 2

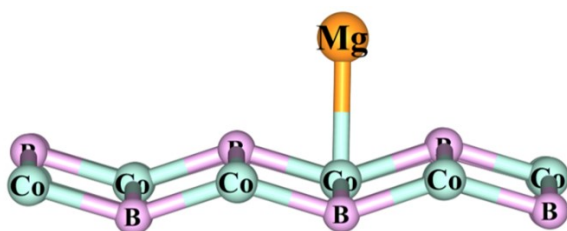

Mg@CoB site 3

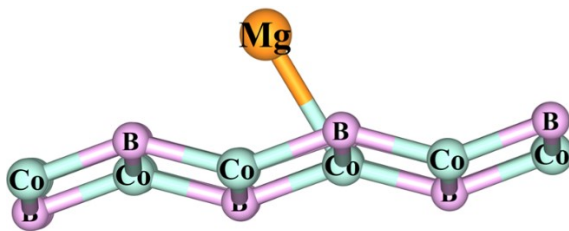

Mg@CoB site 4

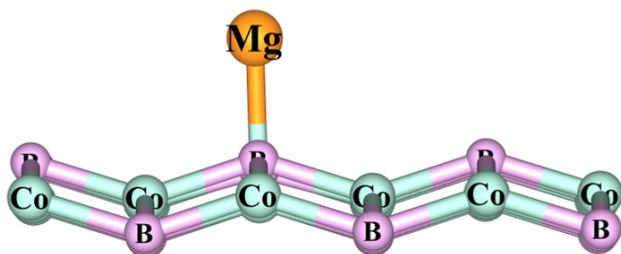

Mg@CoB site 5

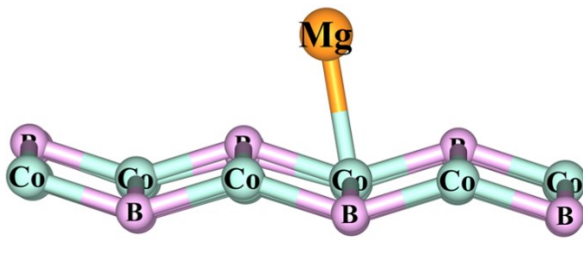

Mg@CoB site 6

**Figure S3.** The optimized structure of single Mg atom adsorption on CoB anti-MXene at different sites (triglyme condition).

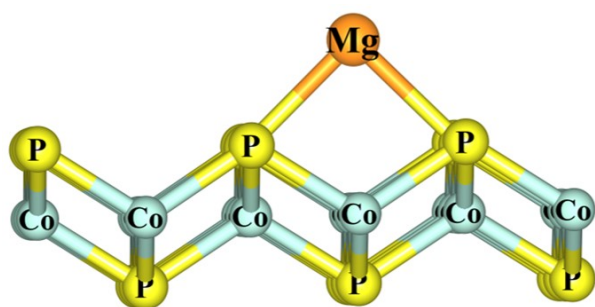

Mg@CoP site 1

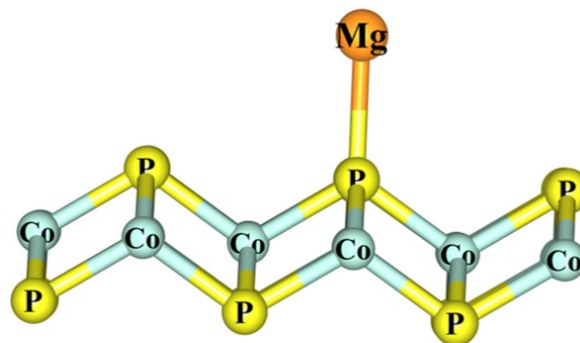

Mg@CoP site 2

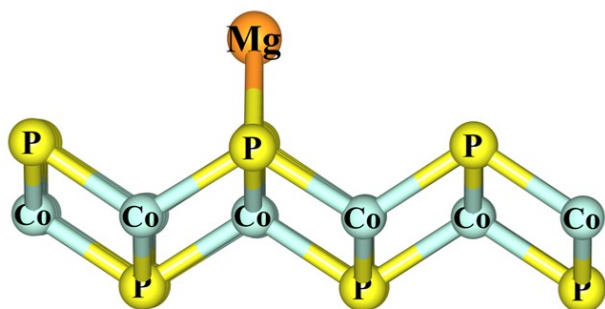

Mg@CoP site 3

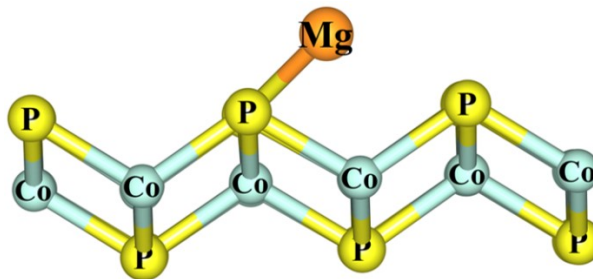

Mg@CoP site 4

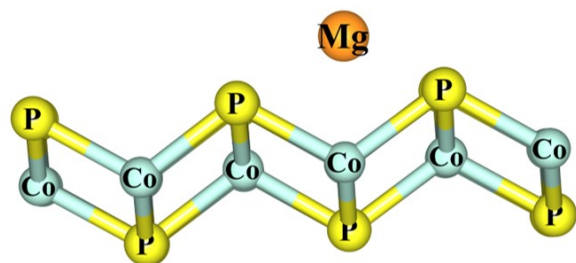

Mg@CoP site 5

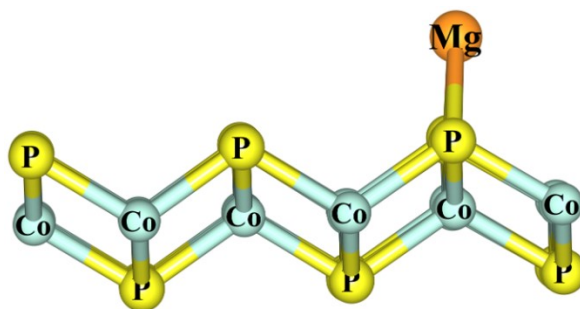

Mg@CoP site 6

**Figure S4.** The optimized structure of single Mg atom adsorption on CoP anti-MXene at different sites (diglyme condition).

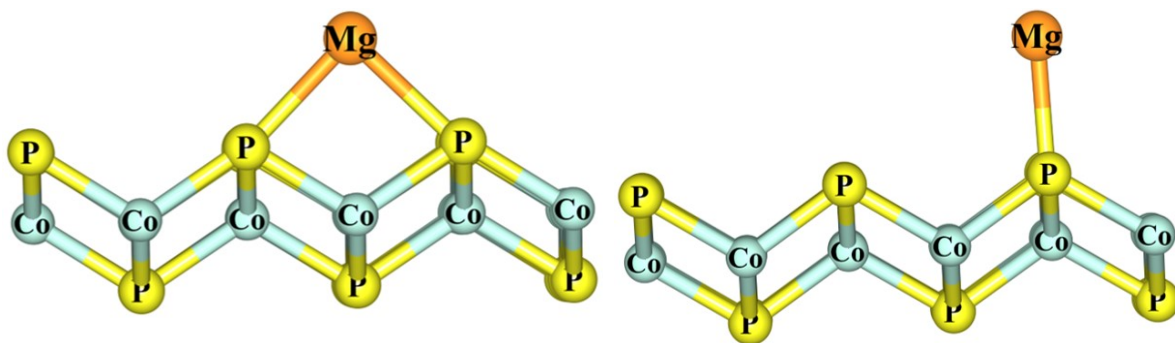

Mg@CoP site 1

Mg@CoP site 2

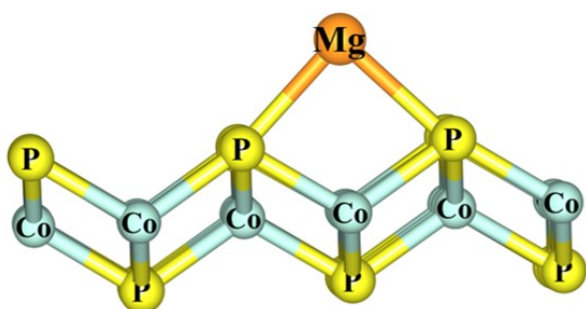

Mg@CoP site 3

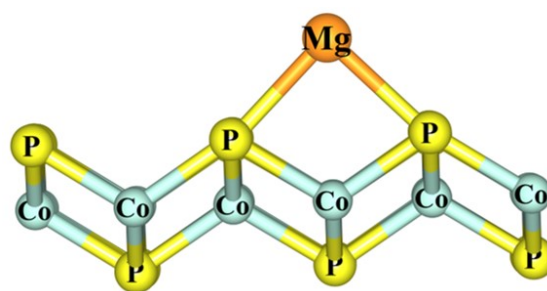

Mg@CoP site 4

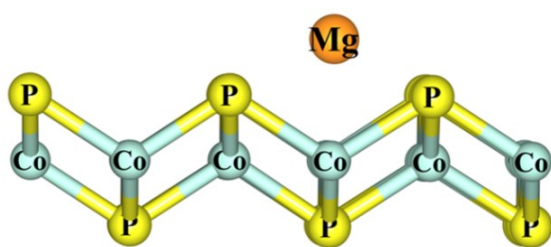

Mg@CoP site 5

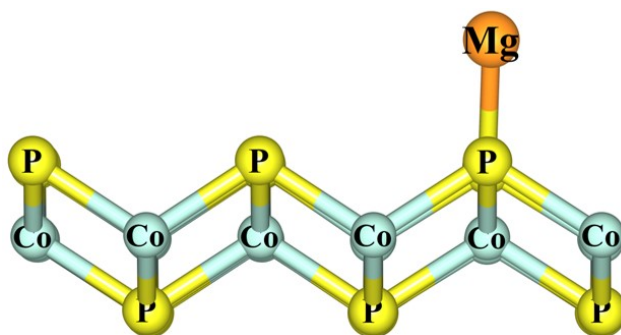

Mg@CoP site 6

**Figure S5.** The optimized structure of single Mg atom adsorption on CoB anti-MXene at different sites (triglyme condition).

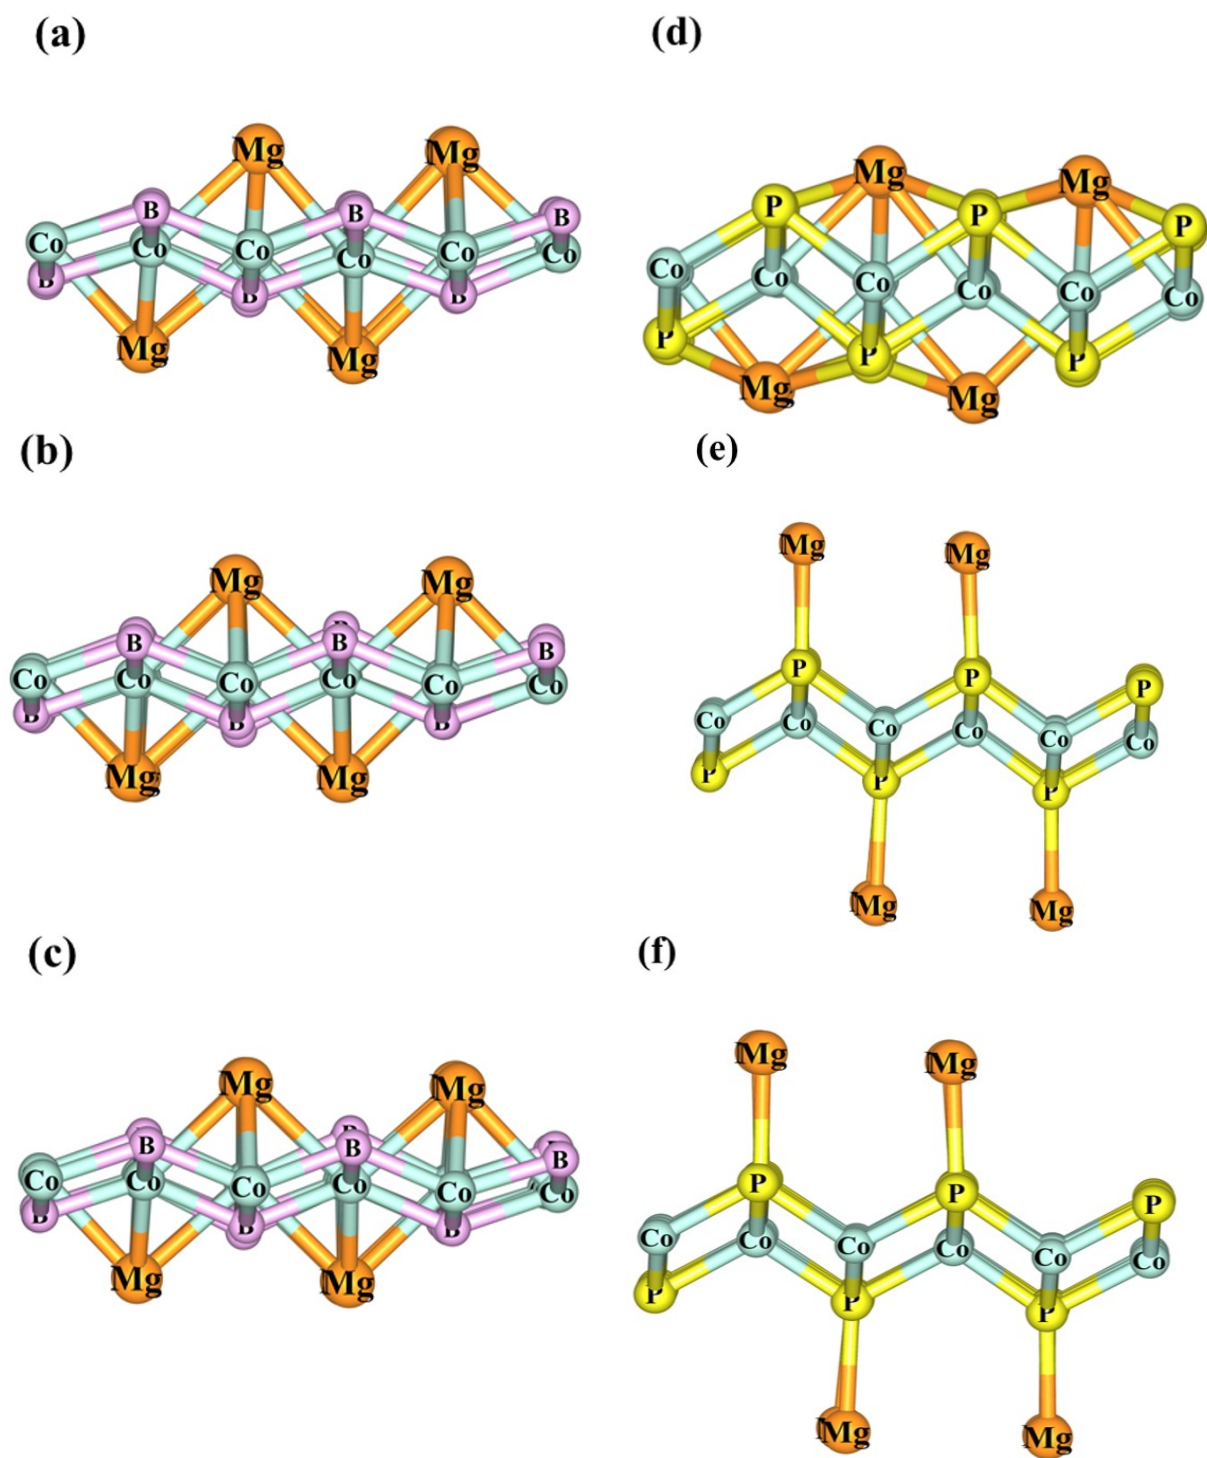

**Figure S6.** (a-f) depict the optimized structures of  $\text{Mg}_8\text{Co}_{18}\text{B}_{18}$  and  $\text{Mg}_8\text{Co}_{18}\text{P}_{18}$  systems, respectively for vacuum, diglyme, and triglyme effects.
